# Supplementary material
Source: ML conference proceedings conference paper supplement (https://openreview.net/forum?id=FWsGuAFn3n)
Supplement: supplementary_material [file attachment]

# README

## Reproduce evaluation results in Table 2.

### 1. Installation

| Package           | Version   |
|-------------------|-----------|
| Python            | 3.8       |
| PyTorch           | 1.10.1    |
| CUDA              | 11.3      |
| PyTorch Geometric | 2.0.4     |
| RDKit             | 2022.03.5 |

Create the conda enviroment:

```
cd ./promptdiff
conda env create -f promptdiff.yaml
# For Vina Docking
pip install meeko==0.1.dev3 scipy pdb2pqr vina==1.2.2
python -m pip install git+https://github.com/Valdes-Tresanco-MS/AutoDockTools_py3
```

### 2. Evaluation from sampled results (.pt)

#### a. Dataset preparation

The data used for evaluation are organized in the Google Drive folder ([https://drive.google.com/drive/folders/1j21cc7-97TedKh\\_El5E34yI8o5ckI7eK?usp=share\\_link](https://drive.google.com/drive/folders/1j21cc7-97TedKh_El5E34yI8o5ckI7eK?usp=share_link)), which is provided by TargetDiff.

```
https://drive.google.com/drive/folders/1j21cc7-97TedKh_El5E34yI8o5ckI7eK?usp=share_link
```

#### b. Evaluate the sampled molecule ligands

Evaluation results in paper

| Methods                    |            | Vina Score (↓) |              | Vina Min (↓) |              | Vina Dock (↓) |              | High Affinity (↑) |              | QED (↑)     |             | SA (↑)      |             | Diversity (↑) |             |
|----------------------------|------------|----------------|--------------|--------------|--------------|---------------|--------------|-------------------|--------------|-------------|-------------|-------------|-------------|---------------|-------------|
|                            |            | Avg.           | Med.         | Avg.         | Med.         | Avg.          | Med.         | Avg.              | Med.         | Avg.        | Med.        | Avg.        | Med.        | Avg.          | Med.        |
| Reference                  |            | -6.36          | -6.46        | -6.71        | -6.49        | -7.45         | -7.26        | -                 | -            | 0.48        | 0.47        | 0.73        | 0.74        | -             | -           |
| Compare with Non-Diffusion | LiGAN      | -              | -            | -            | -            | -6.33         | -6.20        | 21.1%             | 11.1%        | 0.39        | 0.39        | 0.59        | 0.57        | 0.66          | 0.67        |
|                            | GraphBP    | -              | -            | -            | -            | -4.80         | -4.70        | 14.2%             | 6.7%         | 0.43        | 0.45        | 0.49        | 0.48        | <b>0.79</b>   | <b>0.78</b> |
|                            | AR         | <u>-5.75</u>   | <u>-5.64</u> | -6.18        | <u>-5.88</u> | -6.75         | -6.62        | 37.9%             | 31.0%        | 0.51        | 0.50        | <u>0.63</u> | <u>0.63</u> | 0.70          | 0.70        |
|                            | Pocket2Mol | -5.14          | -4.70        | <u>-6.42</u> | -5.82        | <u>-7.15</u>  | <u>-6.79</u> | 48.4%             | <u>51.0%</u> | <b>0.56</b> | <b>0.57</b> | <b>0.74</b> | <b>0.75</b> | 0.69          | 0.71        |
|                            | PROMPTDIFF | <b>-5.86</b>   | <b>-6.51</b> | <b>-7.14</b> | <b>-7.27</b> | <b>-8.33</b>  | <b>-8.49</b> | <b>66.8%</b>      | <b>73.9%</b> | <u>0.53</u> | <u>0.54</u> | 0.58        | 0.58        | <u>0.72</u>   | <u>0.72</u> |
| Compare with Diffusion     | TargetDiff | -5.47          | -6.30        | -6.64        | -6.83        | -7.80         | -7.91        | 58.1%             | 59.1%        | 0.48        | 0.48        | 0.58        | 0.58        | <u>0.72</u>   | <u>0.71</u> |
|                            | DecompDiff | <u>-5.67</u>   | -6.04        | <u>-7.04</u> | <u>-7.09</u> | <b>-8.39</b>  | <u>-8.43</u> | 64.4%             | <u>71.0%</u> | 0.45        | 0.43        | <b>0.61</b> | <b>0.60</b> | 0.68          | 0.68        |
|                            | PROMPTDIFF | <b>-5.86</b>   | <b>-6.51</b> | <b>-7.14</b> | <b>-7.27</b> | <u>-8.33</u>  | <b>-8.49</b> | <b>66.8%</b>      | <b>73.9%</b> | <b>0.53</b> | <b>0.54</b> | <u>0.58</u> | <u>0.58</u> | <b>0.74</b>   | <b>0.72</b> |

The sampled molecule ligands of PromptDiff are provided in the directory:

```
./sampled_results_promptdiff
```

## step 1. run the following command for evaluation

```
conda activate promptdiff
cd ./promptdiff
python eval.py --eval_start_index 0 --eval_end_index 99 --docking_mode vina_dock --
protein_root ./crossdocked_v1.1_rmsd1.0 --sampled_results_path
./sampled_results_promptdiff --eval_result_path ./eval_results_promptdiff
```

### For Vina Docking

The '**docking\_mode**' can be chosen from {'none', 'vina\_score', 'vina\_dock'}

**none**: QED, SA only;

**vina score**: QED + SA + vina score + vina min; (faster)

**vina dock**: QED + SA + vina score + vina min + vina dock. (slower)

And in our paper, we select the vina\_dock for the evaluation, the evaluation results are present in Table 2.

**⚠ Note**: It will take some time to prepare pqdqt and pqr files when you run the evaluation code with vina\_score/vina\_dock docking mode for the first time. And we provide the evaluated results in the directory:

```
./eval_results_promptdiff
```

## step 2 (optional). calculate the overall evaluation results

If you evaluate the sampled results separately, you can run the following command for calculating the overall results.

```
cd ./promptdiff
python cal_overall_eval_results.py --eval_result_path ./eval_results_promptdiff --
docking_mode vina_dock
```

### 3. Training and inference code

---

We are committed to open sourcing the train/inference code upon paper acceptance.
